# Supplementary material for: Foetal weight prediction models at a given gestational age in the absence of ultrasound facilities: application in Indonesia
Source: Springer Nature journal article supplement (doi:10.1186/s12884-018-2047-z), 2018-11-06
Supplement: MOESM2 [file 16255250]

**Table S2** Intraclass correlation coefficient analysis of the existing ultrasonic formulas in predicting foetal biometrics

| Foetal biometrics | Intraclass correlation coefficient (single measure) | 95% Confidence interval |             | F test with true value 0 |     |     |      |
|-------------------|-----------------------------------------------------|-------------------------|-------------|--------------------------|-----|-----|------|
|                   |                                                     | Lower bound             | Upper bound | Value                    | df1 | df2 | Sig  |
| HC                | 0.957                                               | 0.943                   | 0.968       | 67.704                   | 126 | 252 | .000 |
| AC                | 0.996                                               | 0.995                   | 0.997       | 738.785                  | 126 | 252 | .000 |
