# Supplementary material for: Foetal weight prediction models at a given gestational age in the absence of ultrasound facilities: application in Indonesia
Source: Springer Nature journal article supplement (doi:10.1186/s12884-018-2047-z), 2018-11-06
Supplement: MOESM3 [file 16255250]

**Table S3** Interclass correlation efficient analysis for predicting foetal biometrics

| Reference                  | Variables    | Complete samples | Pearson correlation coefficient (r) | Number of estimates within 10% of actual values |    |
|----------------------------|--------------|------------------|-------------------------------------|-------------------------------------------------|----|
|                            |              |                  |                                     | n                                               | %  |
| Australian standard [1]    | Estimated HC | 127              | 0.212*                              | 125                                             | 98 |
|                            | Estimated AC |                  | 0.078                               | 112                                             | 88 |
| UK standard [2]            | Estimated HC |                  | 0.205*                              | 125                                             | 98 |
|                            | Estimated AC |                  | 0.076                               | 104                                             | 82 |
| International standard [3] | Estimated HC |                  | 0.191*                              | 125                                             | 98 |
|                            | Estimated AC |                  | 0.077                               | 107                                             | 84 |

\*The p-value of less than 0.05 confirms significant correlation

### References:

1. Westerway SC, Davison A, Cowell S. Ultrasonic fetal measurements: new Australian standards for the new millennium. *Australian and New Zealand Journal of Obstetrics and Gynaecology* 2000; 40(3):297-302.
2. Loughna P, Chitty L, Evans T, Chudleigh T. Fetal size and dating: charts recommended for clinical obstetric practice. *Ultrasound* 2009; 17(3):160-166.
3. Papageorghiou AT, Ohuma EO, Altman DG, Todros T, Ismail LC, Lambert A, Jaffer YA, Bertino E, Gravett MG, Purwar M. International standards for fetal growth based on serial ultrasound measurements: the Fetal Growth Longitudinal Study of the INTERGROWTH-21 st Project. *The Lancet* 2014; 384(9946):869-879.
