# Supplementary material for: Foetal weight prediction models at a given gestational age in the absence of ultrasound facilities: application in Indonesia
Source: Springer Nature journal article supplement (doi:10.1186/s12884-018-2047-z), 2018-11-06
Supplement: MOESM4 [file 16255250]

**Table S4** Correlation coefficient of the potentially clinical predictors of foetal weight estimation

|                        | <b>GA</b> | <b>FH</b> | <b>EFW<sub>r</sub></b> |
|------------------------|-----------|-----------|------------------------|
| <b>FH</b>              | 0.100     |           |                        |
| <b>EFW<sub>r</sub></b> | 0.046     | 0.952*    |                        |
| <b>ABW</b>             | 0.030     | 0.795*    | 0.825*                 |

\*The p-value of less than 0.05 confirms significant correlation
