# Supplementary material for: Foetal weight prediction models at a given gestational age in the absence of ultrasound facilities: application in Indonesia
Source: Springer Nature journal article supplement (doi:10.1186/s12884-018-2047-z), 2018-11-06
Supplement: MOESM5 [file 16255250]

**Table S5** Models recommended by the best subset selection algorithm together with corresponding analysis of variance information

| Model | Number of variables | R <sup>2</sup> (%) | R <sup>2</sup> (adj) (%) | R <sup>2</sup> (pred) (%) | Mallows Cp | S (g)  | GA (weeks)                     | FH                             | Estimated foetal HC (cm)         | Estimated foetal AC (cm)         |
|-------|---------------------|--------------------|--------------------------|---------------------------|------------|--------|--------------------------------|--------------------------------|----------------------------------|----------------------------------|
| (1)   | 1                   | 88.3               | 88.2                     | 87.9                      | 3.4        | 123.90 |                                | √                              |                                  |                                  |
| (2)   | 2                   | 88.8               | 88.5                     | 87.6                      | 3.6        | 122.27 | √<br>(VIF <sup>+</sup> = 1.01) | √<br>(VIF <sup>+</sup> = 1.01) |                                  |                                  |
| (3)   | 2                   | 88.8               | 88.5                     | 87.6                      | 2.0        | 122.22 |                                | √<br>(VIF <sup>+</sup> = 1.01) | √<br>(VIF <sup>+</sup> = 1.01)   |                                  |
| (4)   | 2                   | 88.8               | 88.5                     | 87.6                      | 2.1        | 122.26 |                                | √<br>(VIF <sup>+</sup> = 1.01) |                                  | √<br>(VIF <sup>+</sup> = 1.01)   |
| (5)   | 3                   | 88.8               | 88.4                     | 82.5                      | 4.0        | 122.92 |                                | √<br>(VIF <sup>+</sup> = 1.01) | √<br>(VIF <sup>+</sup> = 194.80) | √<br>(VIF <sup>+</sup> = 194.88) |

<sup>+</sup>Mallows Cp close to p (the number of explanatory variables) indicates a good fit and VIF > 10 indicates the presence of multicollinearity.
