# Supplementary material for: Foetal weight prediction models at a given gestational age in the absence of ultrasound facilities: application in Indonesia
Source: Springer Nature journal article supplement (doi:10.1186/s12884-018-2047-z), 2018-11-06
Supplement: MOESM7 [file 16255250]

**Table S7** Two independent sample t-tests between ABW, EFW<sub>r</sub>, and EFW<sub>p</sub>

| Sample size n = 38            | Estimate for difference | DF | T-value | P-value |
|-------------------------------|-------------------------|----|---------|---------|
| ABW – EFW <sub>r</sub>        | 20.5                    | 73 | 0.23    | 0.815   |
| ABW – EFW <sub>Model(1)</sub> | 2.4                     | 73 | 0.03    | 0.978   |
| ABW – EFW <sub>Model(2)</sub> | -0.2                    | 73 | -0.00   | 0.998   |
| ABW – EFW <sub>Model(3)</sub> | -1.6                    | 73 | -0.02   | 0.986   |
| ABW – EFW <sub>Model(4)</sub> | -0.3                    | 73 | -0.00   | 0.997   |

\*The p-value < 0.05 indicates a significant difference
